# Supplementary material for: Medically Relevant Acinetobacter Species Require a Type II Secretion System and Specific Membrane-Associated Chaperones for the Export of Multiple Substrates and Full Virulence
Source: PubMed Central journal article supplement (PMC4713064; doi:10.1371/journal.ppat.1005391), 2016-01-14

### Survival

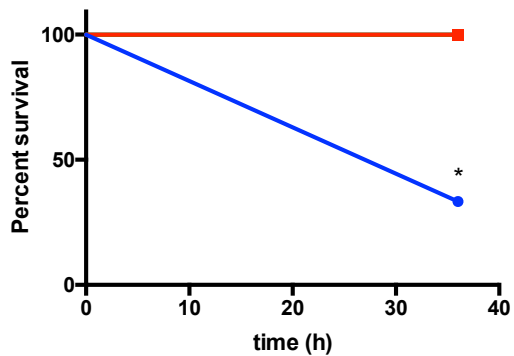

- 3X10<sup>9</sup> cfu inoculum
- 1X10<sup>9</sup> cfu inoculum
- 3X10<sup>8</sup> cfu inoculum
- 3X10<sup>7</sup> cfu inoculum

### Lung

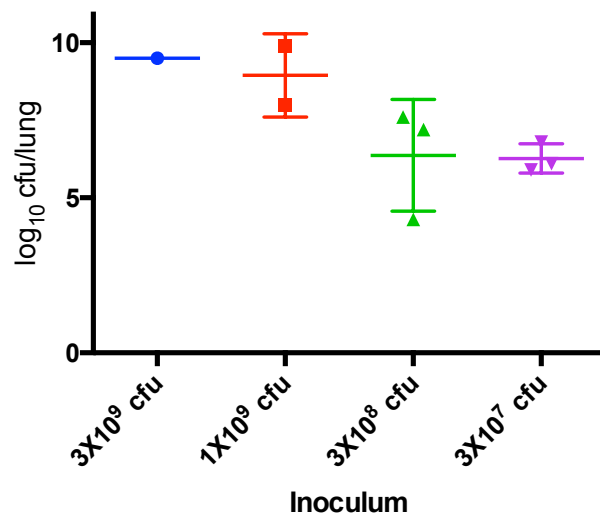

### Liver

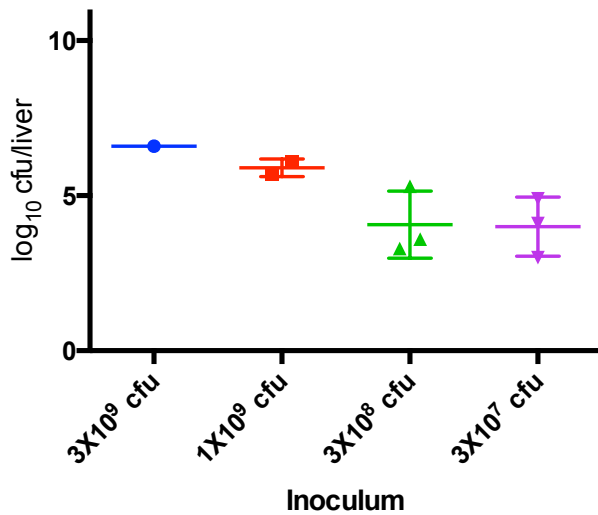

### Spleen

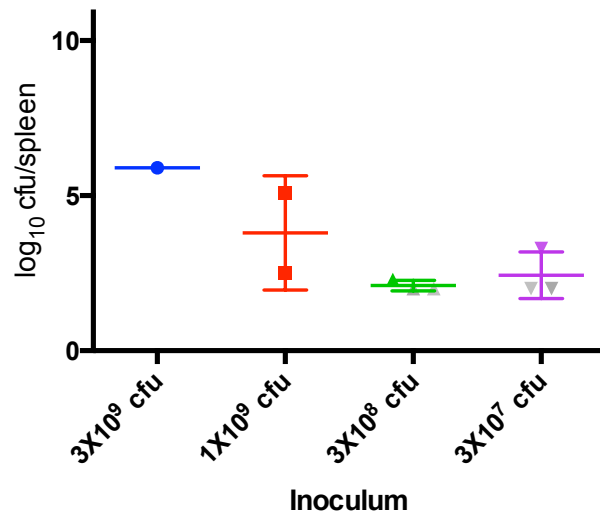

Supplement: ppat.1005391.s007.pdf [file ppat.1005391.s007.pdf]
